# Supplementary material
Source: PubMed Central journal article supplement (PMC3476456)
Supplement: NIHMS409977-supplement-supplement_1.pdf [file NIHMS409977-supplement-supplement_1.pdf]

Isomerization of the Hydride Complexes  
 $[\text{HFe}_2(\text{SR})_2(\text{PR}_3)_x(\text{CO})_{6-x}]^+$  ( $x = 2, 3, 4$ ) Relevant to the Active Site  
Models for the [FeFe]-Hydrogenases

Bryan E. Barton, Giuseppe Zampella, Aaron K. Justice, Luca De Gioia\*, Thomas B.  
Rauchfuss\*, Scott R. Wilson

**Supporting Information**

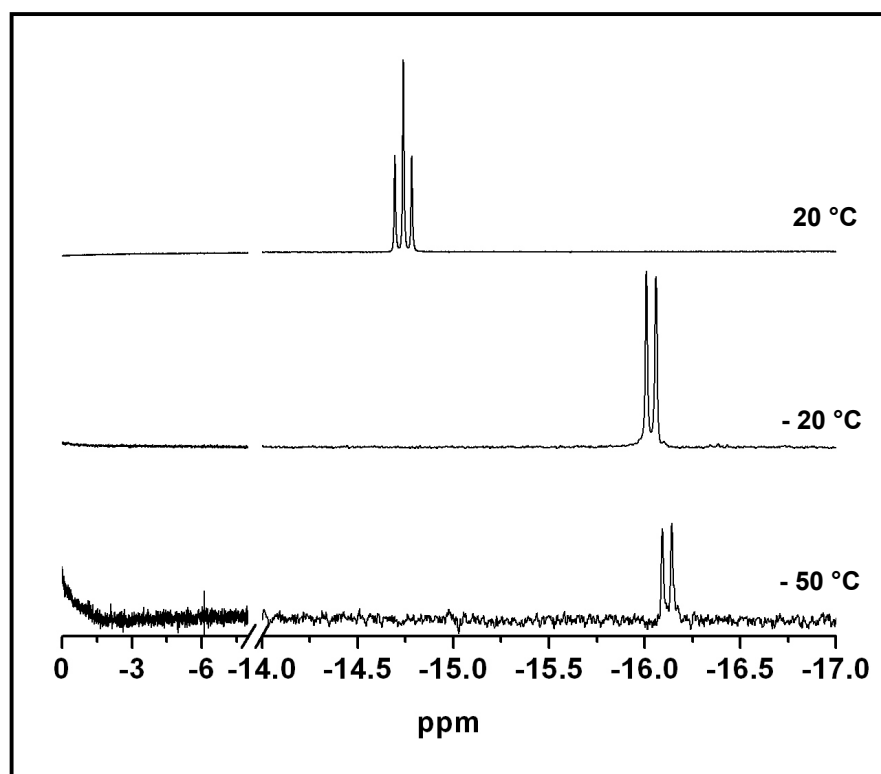

**Figure S1.**  $^1\text{H}$  NMR (500 MHz) spectra of a  $\text{CD}_2\text{Cl}_2$  solution of **1**,  $\text{Fe}_2(\text{edt})(\text{CO})_4(\text{dppv})$ , after protonation with 3 equiv  $\text{HBF}_4 \cdot \text{Et}_2\text{O}$  at  $-80\text{ }^\circ\text{C}$ , then warmed to recorded temperatures. Spectrum recorded at  $20\text{ }^\circ\text{C}$  is after 48 h at room temperature.

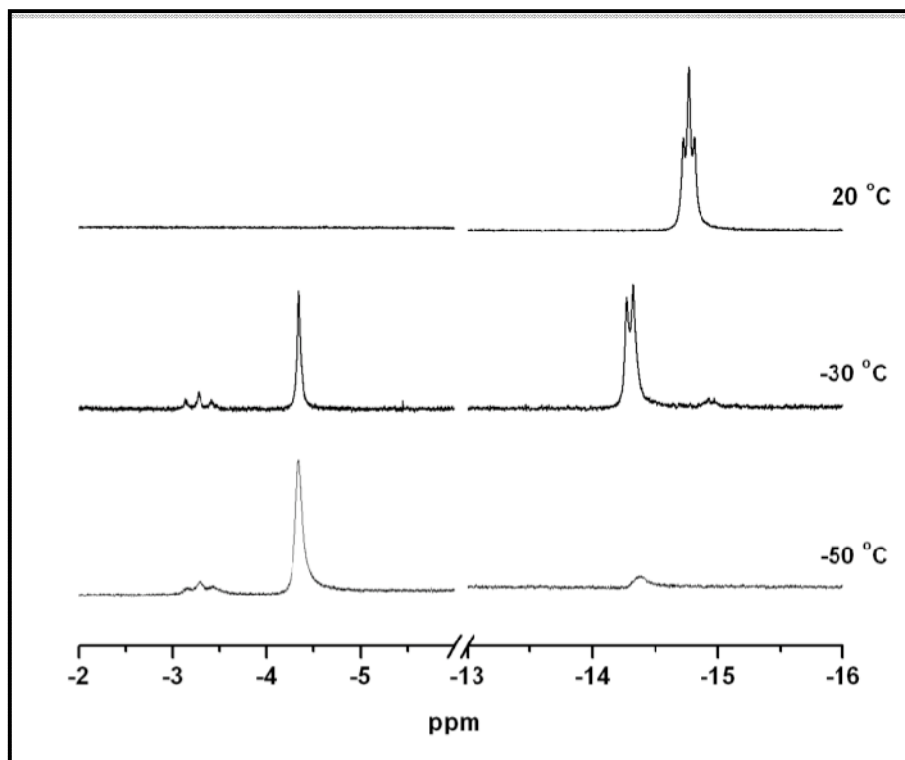

**Figure S2.**  $^1\text{H}$  NMR (500 MHz) spectra of a  $\text{CD}_2\text{Cl}_2$  solution of **2**,  $\text{Fe}_2(\text{pdt})(\text{CO})_4(\text{dppv})$ , after protonation with 3 equiv  $\text{HBF}_4 \cdot \text{Et}_2\text{O}$  at  $-80\text{ }^\circ\text{C}$ , then warmed to recorded temperatures. Spectrum recorded at  $20\text{ }^\circ\text{C}$  is after 16 h at room temperature.

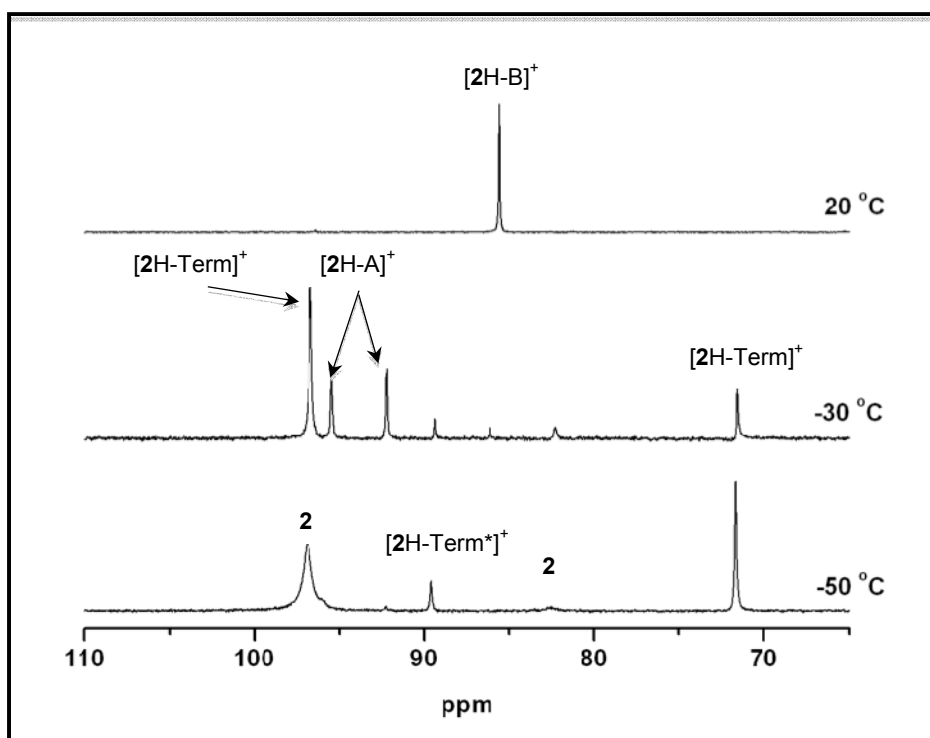

**Figure S3.** Protonation of **2**,  $\text{Fe}_2(\text{pdt})(\text{CO})_4(\text{dppv})$ , with 3 equiv  $\text{HBF}_4 \cdot \text{Et}_2\text{O}$  at  $-80^\circ\text{C}$ , then warmed to recorded temperatures.  $^{31}\text{P}\{^1\text{H}\}$  NMR (202 MHz) acquired with  $-50^\circ\text{C}$   $^1\text{H}$  NMR above shows the growth of signals at 97 and 72 ppm ( $[\text{2H-Term}]^+$ , for terminal hydride derivative wherein dppv is apical, basal) and a signal at 89 ppm ( $[\text{2H-Term}^*]^+$ , terminal hydride with hydride on dibasal-dppv side). When sample is warmed to  $-30^\circ\text{C}$ , new signals are observed at 92 and 95 ppm ( $[\text{2H-A}]^+$  - is bridging hydride of apical,basal-dppv). When sample is warmed to room temperature, only one signal is observed at 86 ppm ( $[\text{2H-B}]^+$ - thermodynamic product with dppv as dibasal (triplet in high-field  $^1\text{H}$  NMR). At low temperature, signals at 96 and 82 ppm are due to remaining starting material.

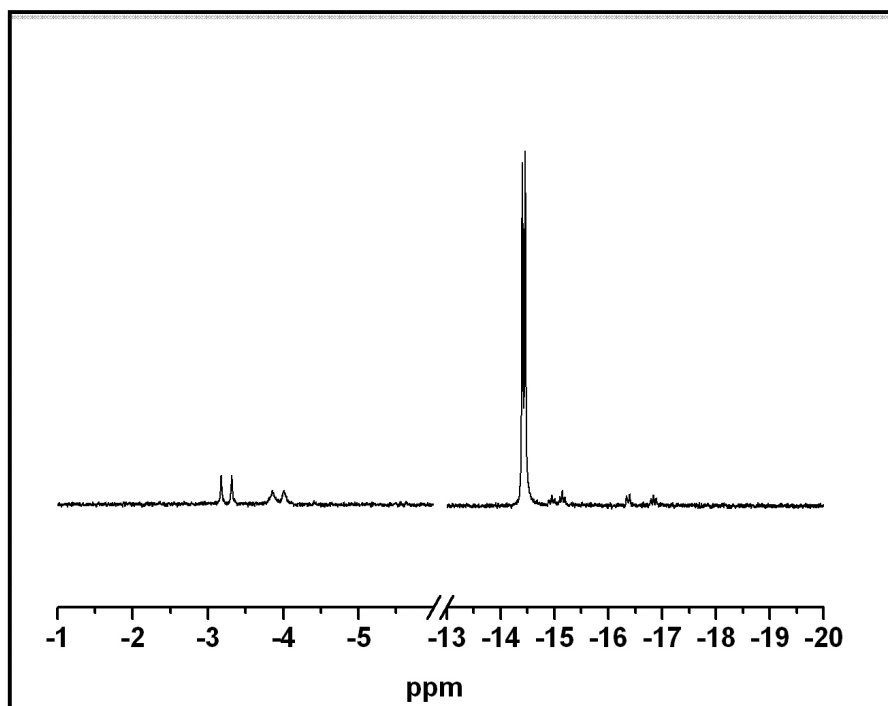

**Figure S4.** <sup>1</sup>H NMR (500 MHz) spectrum of a CD<sub>2</sub>Cl<sub>2</sub> solution of **4**, Fe<sub>2</sub>(pdt)(CO)<sub>3</sub>(PMe<sub>3</sub>)(dppv), after protonation with HBF<sub>4</sub>•Et<sub>2</sub>O at -90 °C. Signals at -3, -4 ppm are assigned to isomers of the terminal hydride and appear as doublets with J<sub>PH</sub> ~ 75 Hz. The intense signal at -14.3 ppm with J<sub>PH</sub> ~ 30 Hz is assigned to [4H-A]<sup>+</sup>. For spectra at higher temperature, see Figure S5.

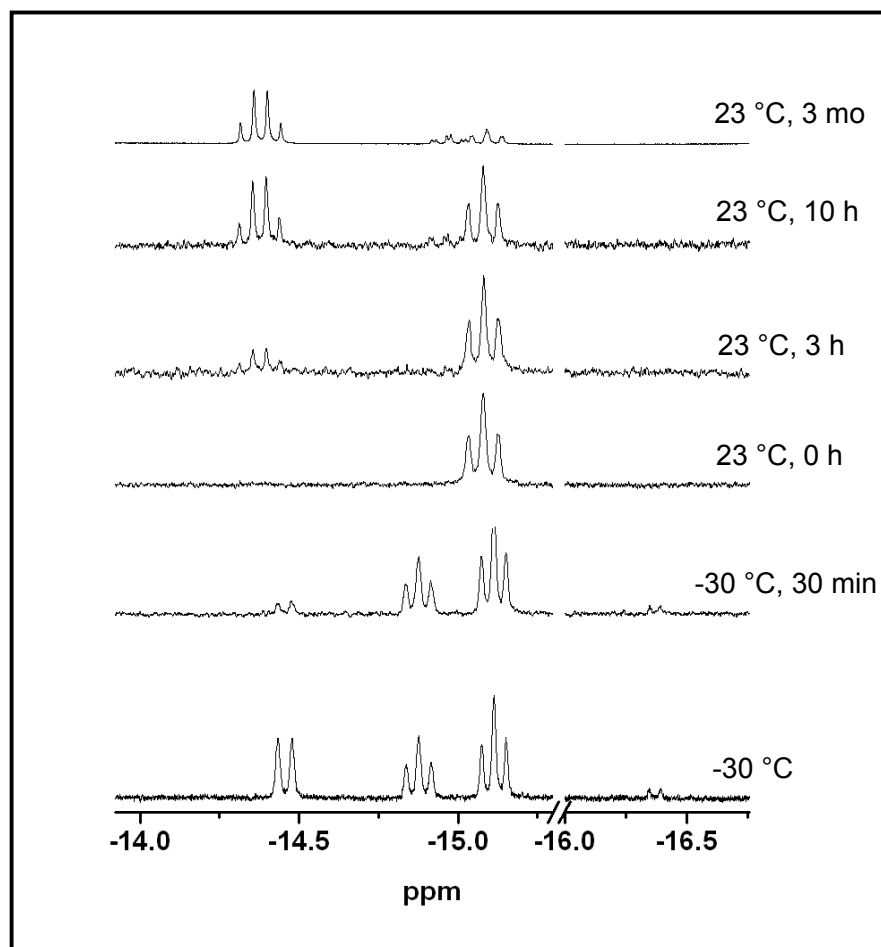

**Figure S5.** <sup>1</sup>H NMR (500 MHz) spectra of CD<sub>2</sub>Cl<sub>2</sub> solution of **4** Fe<sub>2</sub>(pdt)(CO)<sub>3</sub>(PMe<sub>3</sub>)(dppv) after warming to various temperatures. Labeling is as follows (for peaks observed at -30 °C): δ -14.4 (dt) is [4H-A]<sup>+</sup>, δ -14.7 (td) is [4H-B\*]<sup>+</sup>, δ -15.3 (td) is [4H-B]<sup>+</sup> (for peaks observed at 23 °C): δ -14.3 (q) is [4H-C]<sup>+</sup>, δ -14.8 (td) is [4H-D]<sup>+</sup>. Peak at δ -16.4 is unknown.

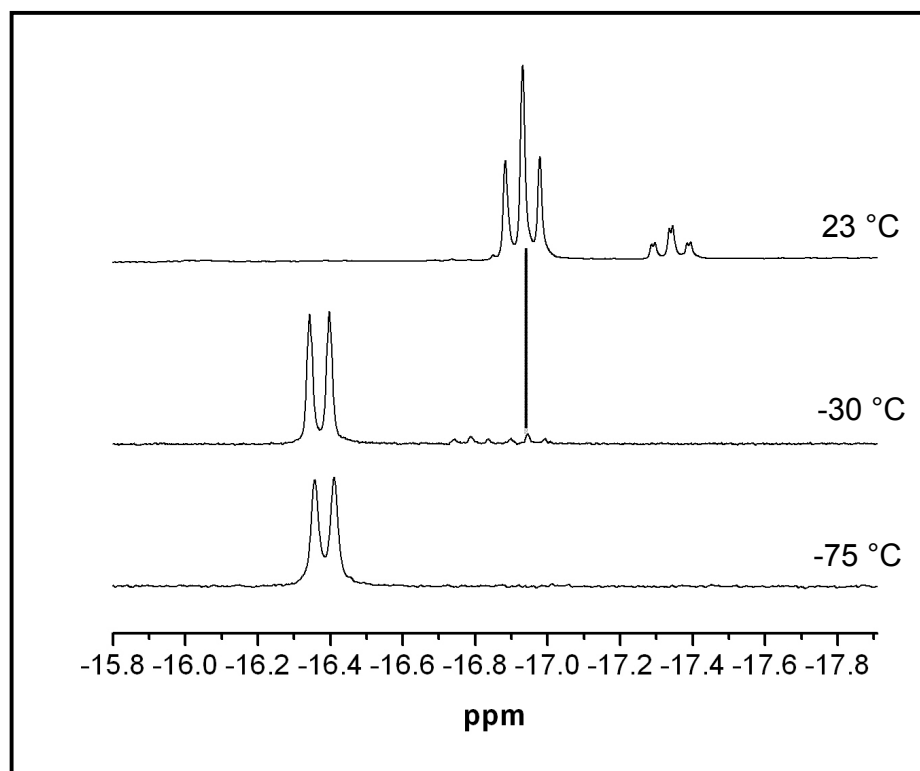

**Figure S6.** <sup>1</sup>H NMR (500 MHz) spectra of CD<sub>2</sub>Cl<sub>2</sub> solution of **3**, Fe<sub>2</sub>(edt)(CO)<sub>3</sub>(PMe<sub>3</sub>)(dppv), after protonation with [H(Et<sub>2</sub>O)<sub>2</sub>]BAr<sup>F</sup><sub>4</sub> at -90 °C and recorded at various temperatures. At -75 °C, a doublet is the sole species present in the <sup>1</sup>H NMR spectrum, J<sub>PH</sub> ~30 Hz (indicating a single P atom *cis* to the hydride). Upon warming to -30 °C, two new triplets are observed in the <sup>1</sup>H NMR, J<sub>PH</sub> ~25 Hz (indicating two P atoms *cis* to the hydride). Upon equilibration of [3H]<sup>+</sup> at room temperature for several months, the <sup>1</sup>H NMR displays a triplet and a triplet of doublets, and possibly one more signal with unresolved coupling under the major resonance at δ -16.8. As seen for [4H]<sup>+</sup>, the unstable rotamer [3H-B\*]<sup>+</sup> is observed at δ -16.8.

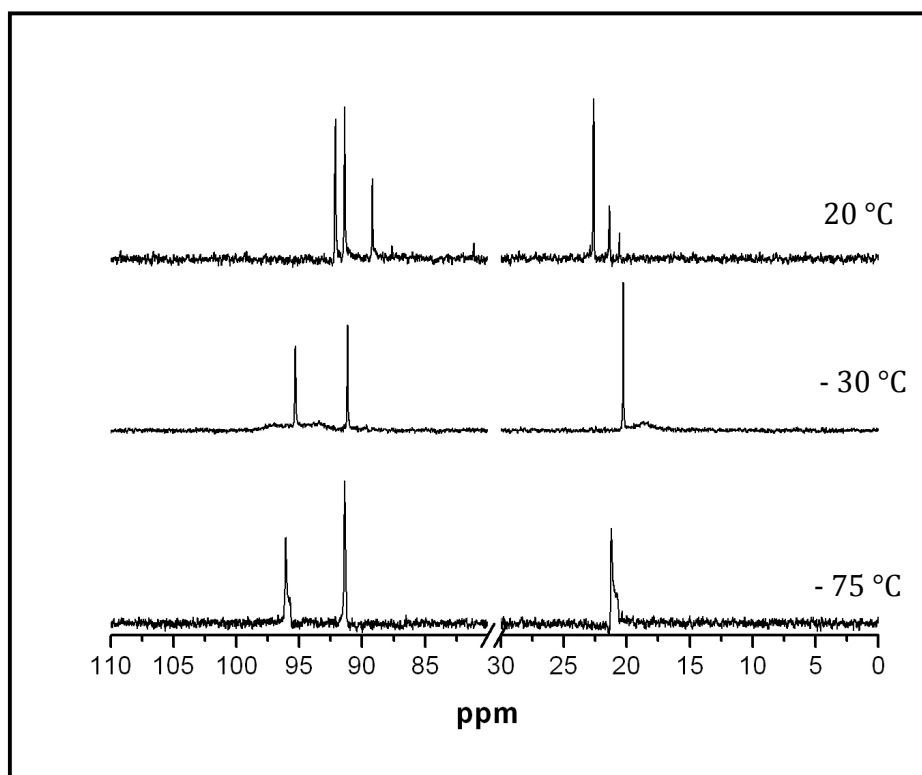

**Figure S7.**  $^{31}\text{P}\{^1\text{H}\}$  NMR spectra of  $\text{CD}_2\text{Cl}_2$  solution of **3**,  $\text{Fe}_2(\text{edt})(\text{CO})_3(\text{PMe}_3)(\text{dppv})$ , after protonation with  $[\text{H}(\text{Et}_2\text{O})_2]\text{BAR}^{\text{F}}_4$  at  $-90\text{ }^\circ\text{C}$  and recorded at various temperatures. At  $-75\text{ }^\circ\text{C}$ , the  $^{31}\text{P}\{^1\text{H}\}$  spectrum shows mostly one isomer, with two signals in the dppv region (apical-basal) and one signal in the  $\text{PMe}_3$  region. At  $-30\text{ }^\circ\text{C}$ , the same peaks remain, smaller broad peaks are due to slight remainder of starting material. Upon equilibration of  $[\mathbf{3H}]^+$  at room temperature for several months, the  $^{31}\text{P}\{^1\text{H}\}$  NMR spectrum displays in the dppv region a set of equally intense peaks at 92, 93 ppm (apical-basal, major isomer), a single resonance at 89 ppm (dibasal, minor isomer), and in the  $\text{PMe}_3$  region three peaks. The missing dppv signal for the third isomer wherein the dppv is possibly dibasal is not observed.



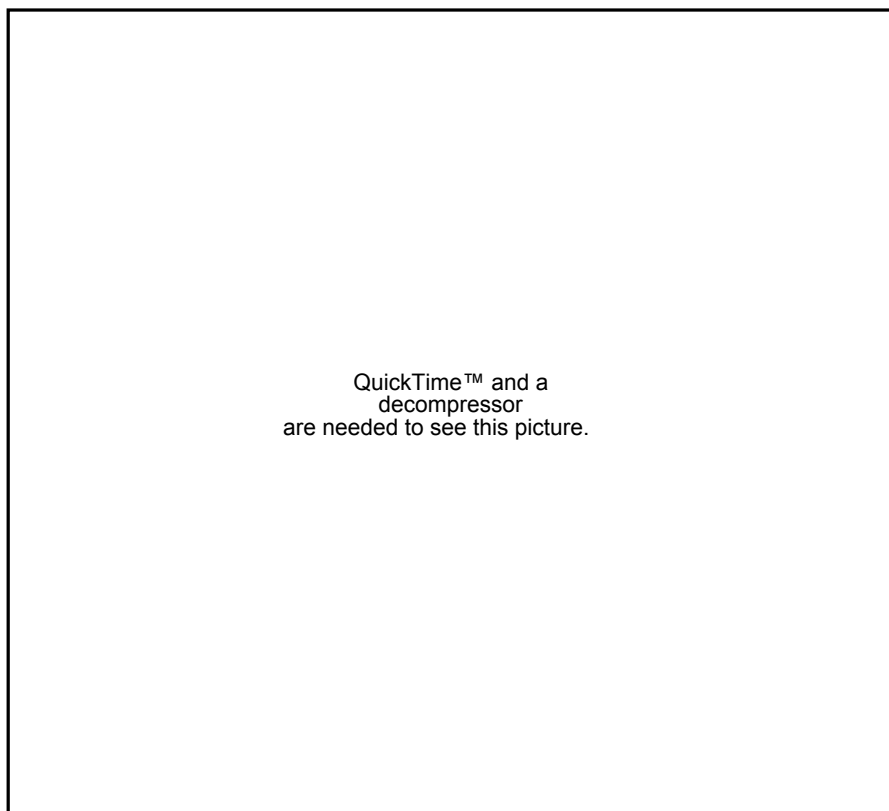

**Figure S8.** High-field  $^1\text{H}$  NMR spectra of a  $d^7$ -DMF solution of  $[\mathbf{4H}]\text{PF}_6$ , **a)** recorded at  $20\text{ }^\circ\text{C}$  on 500 MHz instrument and **b)** after heating to  $80\text{ }^\circ\text{C}$ . The spectrum recorded at  $120\text{ }^\circ\text{C}$  (600 MHz) was after three days at room temperature, decomposition species are labeled:  $\text{Fe}_2(\text{pdt})(\text{CO})_2(\text{dppv})_2$  (—) and unknown poly-phosphine species (—). At  $80\text{ }^\circ\text{C}$  the peaks at  $-13.8\text{ ppm}$  [**4H-C**] and  $-14.5$  [**4H-D**] are broadened. At  $120\text{ }^\circ\text{C}$ , [**4H-B**] and [**4H-C**] are labeled with (—).

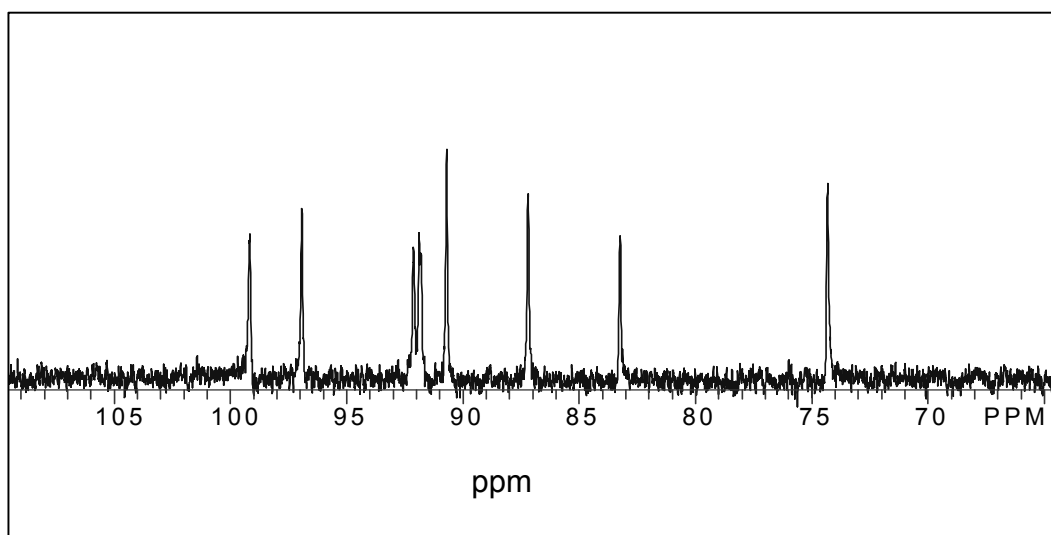

**Figure S9.**  $^{31}\text{P}\{^1\text{H}\}$  NMR (600 MHz,  $\text{CD}_2\text{Cl}_2$ ) spectrum of  $[\text{HFe}_2(\text{edt})(\text{CO})_2(\text{dppv})_2]^+$  recorded at  $-35^\circ\text{C}$ . Peaks corresponding to  $[\mathbf{5H}\text{-Term}]^+$  are at 99, 91, 84, 74 ppm. Remaining signals are due to  $[\mathbf{5H}\text{-A}]^+$  (97, 87 ppm) and  $\mathbf{5}$  (92, 93 ppm).

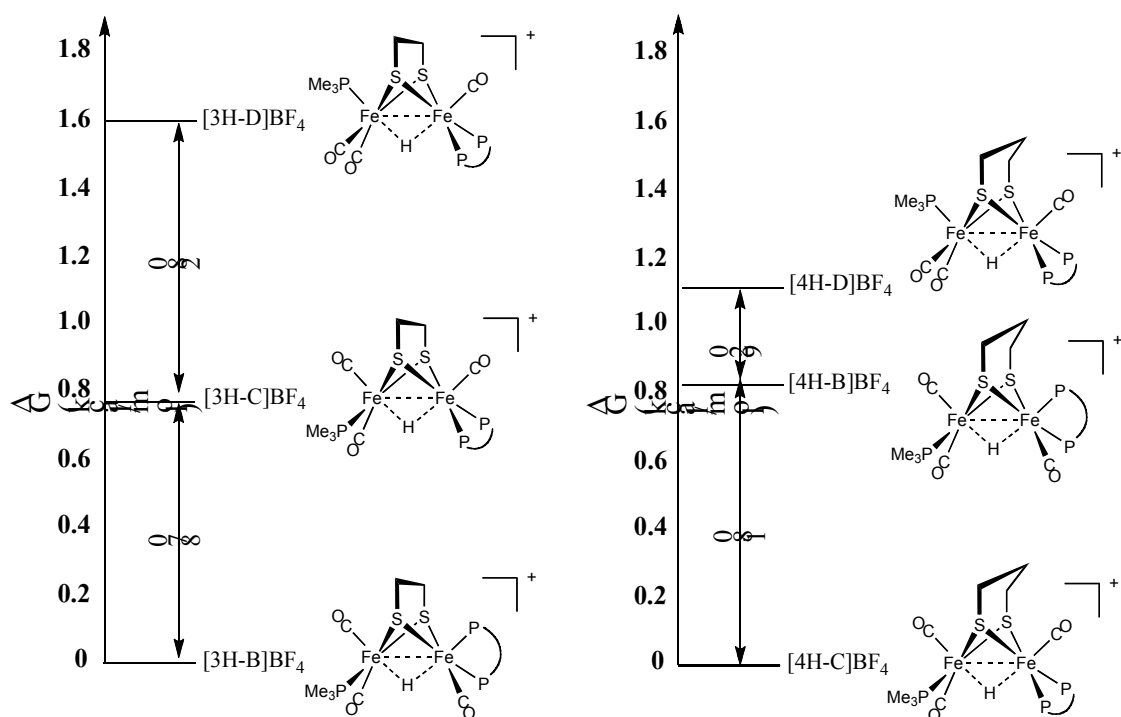

**Figure S10.** Difference in energy for isomers for [3H]<sup>+</sup> and [4H]<sup>+</sup>, [HFe<sub>2</sub>(xdt)(CO)<sub>3</sub>(PMe<sub>3</sub>)(dppv)]BF<sub>4</sub>, as calculated experimentally.

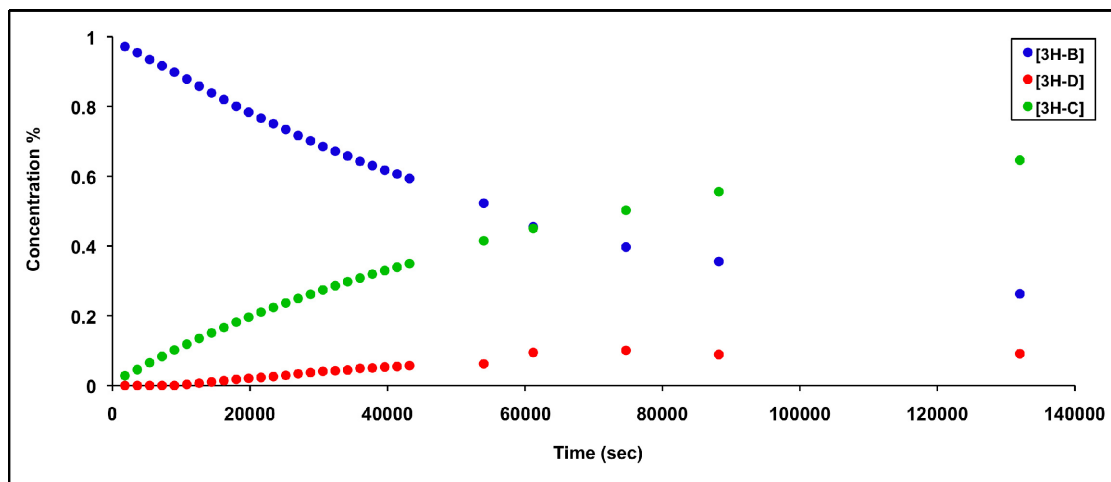

**Figure S11.** Plot monitoring the concentration of  $[4\text{H-B}]^+$ ,  $[4\text{H-C}]^+$  and  $[4\text{H-D}]^+$  as a function of time. Data was collected using  $^1\text{H}$  NMR spectroscopy.

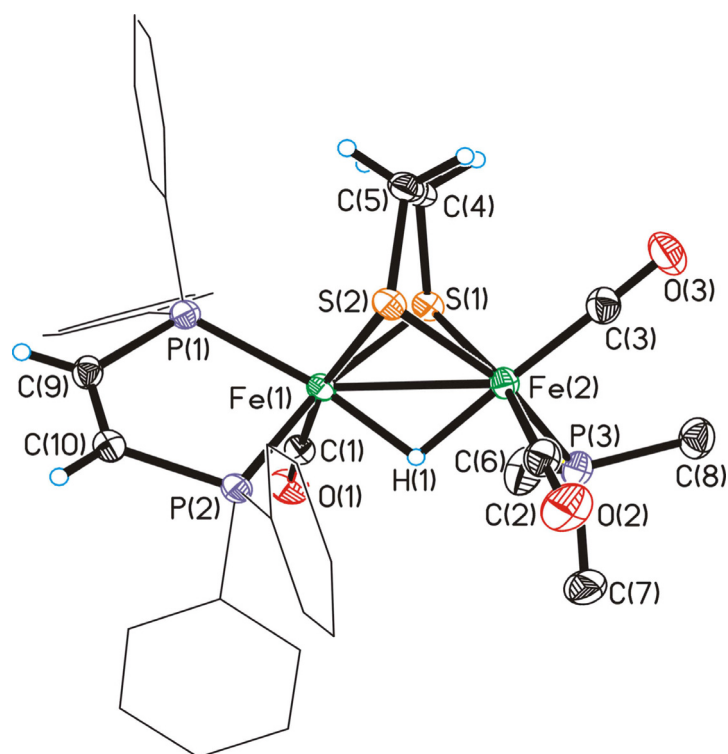

**Table S1.** Crystallographic data for  $[3H-B]^+$ ,  $[HFe_2(edt)(CO)_3(dppv)(PMe_3)]PF_6$ , including selected lengths (Å) and angles (°).

|               |            |                      |              |
|---------------|------------|----------------------|--------------|
| Fe(1) – Fe(2) | 2.5744 (5) | Fe(1) – S(1) – Fe(2) | 69.355 (17)  |
| Fe(1) – S(1)  | 2.2581 (7) | Fe(1) – Fe(2) – S(1) | 55.164 (17)  |
| Fe(1) – S(2)  | 2.2794 (6) | Fe(2) – Fe(1) – P(1) | 148.911 (18) |
| Fe(2) – S(1)  | 2.2668 (7) | Fe(2) – Fe(1) – P(2) | 113.20 (2)   |
| Fe(2) – S(2)  | 2.2760 (6) | Fe(2) – Fe(1) – C(1) | 111.37 (6)   |
| Fe(1) – P(1)  | 2.2137 (6) | P(1) – Fe(1) – P(2)  | 86.80 (2)    |
| Fe(1) – P(2)  | 2.2282 (6) | P(1) – Fe(1) – C(1)  | 90.78 (6)    |
| Fe(1) – C(1)  | 1.765 (2)  | P(2) – Fe(1) – C(1)  | 91.10 (6)    |
| Fe(2) – P(3)  | 2.2549 (7) | Fe(1) – Fe(2) – C(2) | 112.44 (7)   |
| Fe(2) – C(2)  | 1.790 (2)  | Fe(1) – Fe(2) – C(3) | 141.78 (7)   |
| Fe(2) – C(3)  | 1.771 (2)  | Fe(1) – Fe(2) –      | 109.54 (2)   |

|              |           |                         |            |
|--------------|-----------|-------------------------|------------|
|              |           | P(3)                    |            |
| Fe(1) – H(1) | 1.69 (2)  | C(3) – Fe(2) – C(2)     | 95.45 (10) |
| Fe(2) – H(1) | 1.64 (2)  | C(3) – Fe(2) – P(3)     | 94.15 (7)  |
| C(1) – O(1)  | 1.142 (2) | C(2) – Fe(2) – P(3)     | 92.44 (7)  |
| C(2) – O(2)  | 1.140 (3) | Fe(1) – H(1) –<br>Fe(2) | 99.99      |
| C(3) – O(3)  | 1.148 (3) |                         |            |

|                                                  |                                                                                                             |
|--------------------------------------------------|-------------------------------------------------------------------------------------------------------------|
| Complex                                          | [Fe <sub>2</sub> (edt)(μ-H)(CO) <sub>3</sub> (PMe <sub>3</sub> )(dppv)]PF <sub>6</sub>                      |
| Chemical formula                                 | C <sub>34</sub> H <sub>36</sub> F <sub>6</sub> Fe <sub>2</sub> O <sub>3</sub> P <sub>4</sub> S <sub>2</sub> |
| Temperature (K)                                  | 193 (2)                                                                                                     |
| Crystal size (mm <sup>3</sup> )                  | 0.40 x 0.24 x 0.16                                                                                          |
| Crystal system                                   | Triclinic                                                                                                   |
| Space group                                      | P-1                                                                                                         |
| a (Å)                                            | 10.818 (2)                                                                                                  |
| b (Å)                                            | 11.253 (2)                                                                                                  |
| c (Å)                                            | 16.208 (3)                                                                                                  |
| α (°)                                            | 78.473 (3)                                                                                                  |
| β (°)                                            | 86.415 (3)                                                                                                  |
| γ (°)                                            | 81.525 (3)                                                                                                  |
| V (Å <sup>3</sup> )                              | 1911.1 (6)                                                                                                  |
| Z                                                | 2                                                                                                           |
| Density calcd (Mg m <sup>-3</sup> )              | 1.575                                                                                                       |
| μ (Mo Kα, mm <sup>-1</sup> )                     | 0.71073                                                                                                     |
| max./min. trans'n                                | 0.8572 / 0.6869                                                                                             |
| reflections meas'd/Indep.                        | 23821 / 9184                                                                                                |
| data/restraints/parameters                       | 9184 / 0 / 467                                                                                              |
| GOF on F <sup>2</sup>                            | 1.024                                                                                                       |
| Rint                                             | 0.0286                                                                                                      |
| R1 [I > 2σ] (all data) <sup>a</sup>              | 0.0322 (0.0485)                                                                                             |
| wR2 [I > 2σ] (all data) <sup>b</sup>             | 0.0786 (0.0850)                                                                                             |
| max. peak/hole (e <sup>-</sup> /Å <sup>3</sup> ) | 0.392 / -0.374                                                                                              |
